# Supplementary material
Source: publisher figshare collection journal article supplement (https://gsapubs.figshare.com/ndownloader/files/25481798)
Supplement: Supplementary file 1 [file 25481798]

1     **GSA Data Repository**

2

3     **Supplemental Materials for *Zinc isotope evidence for paleoenvironmental changes during***  
4     *Cretaceous Oceanic Anoxic Event 2*

5

6     **Authors:** Xi Chen, Bradley B. Sageman, Hanwei Yao, Sheng'ao Liu, Kaibo Han, Yi Zou, and  
7     Chengshan Wang

8

9     This file includes:

10    1. STUDIED SECTION

11    2. ANALYTICAL METHODS

12    3. Figures DR. 1-6

13    4. Tables DR. 1-2

14    5. References

15

16    **1. STUDIED SECTION**

17       The Gongzha section is located in the Tingri area of Tibet, which tectonically belongs to  
18    the Tethys Himalayas (Fig. DR1). Late Cenomanian to Maastrichtian marine strata of pelagic  
19    depositional environments are well developed in this section (Wang et al., 2004). During the  
20    Cretaceous, the section was located on the northern margin of the Indian continent and the  
21    south margin of the Eastern Tethys Ocean. Because a large fraction of sediments deposited in  
22    the East Tethys Ocean were subducted beneath the Asian continent, sedimentary records in

23 the Tethys Himalayas provide unique opportunities to study the paleoceanography and  
24 paleoenvironment of the Cretaceous of the East Tethys realm.

25 The Gongzha section yields abundant and poorly to moderately preserved foraminifera,  
26 on which biostratigraphy was established (Wan et al., 2003; Li et al., 2006). Li et al. (2006)  
27 published a secular  $\delta^{13}\text{C}_{\text{carb}}$  curve for Upper Cretaceous of this section. Based on bio- and  
28 chemostratigraphic correlation, the OAE 2 equivalent level is identified with the distinct  $\delta^{13}\text{C}$   
29 positive excursion at the Cenomanian-Turonian transition. The OAE 2 interval, as defined by  
30 its characteristic carbon isotope excursion (CIE) in Gongzha is ~ 28 m in thickness. The  
31 depositional environment is outer ramp (Wang et al., 2004). During field logging, Li and his  
32 colleagues painted depth numbers on the rocks every 5 meters. These marked depths acted as  
33 a coherent stratigraphic framework for subsequent studies, e.g., Li et al. (2017), Zhang et al.  
34 (2019), and this study.

35 Although anoxic to euxinic conditions prevailed during OAE 2 in many basins, evidence  
36 does not suggest the same redox conditions characterized the south margin of the eastern  
37 Tethys Ocean. Elemental geochemistry, including redox indicators such as V and Cr, indicate  
38 that the water column was oxygenated during the event (Bomou et al., 2013). In contrast to  
39 these observations, recent  $\delta^{15}\text{N}$  data were interpreted to reflect expansion of an anoxic  
40 environment during the C-T interval (Zhang et al., 2019), however, the  $\delta^{15}\text{N}$  record from  
41 Gongzha does not show the significant negative excursions observed in other OAE2 sites and  
42 interpreted to reflect nutrient and redox dynamics (Kuypers et al., 2004; Junium and Arthur,  
43 2007).

44 Age constraints for OAE 2 in this section are based on planktonic foraminifera and an

45 astronomical time scale (ATS). The lower 70 m of the section contains *R. cushmani*, *W.*  
46 *archaeocretacea*, and *H. helvetica* biozones (Wan et al., 2003; Li et al., 2006; Bomou et al.,  
47 2013). The astronomical time scale from the lower part of the Gongzha section was developed  
48 by Li et al. (2017). Based on the ATS, Li et al. (2017) estimated that the duration of the  $\delta^{13}\text{C}$   
49 excursion (defined by return to background  $\delta^{13}\text{C}$  values) is ~870 kyr (this is the longer of two  
50 common definitions of the event discussed in the literature: e.g., Sageman et al., 2006). They  
51 divided the  $\delta^{13}\text{C}$  curve across OAE 2 into 6 segments, including pre- and post-excursion units.

52 This study largely followed the scheme of Li et al. (2017) to divide the segments of  $\delta^{13}\text{C}$   
53 curve across OAE 2, except for interpretation of the initial onset of the OAE 2 carbon isotope  
54 excursion. There is a fairly consistent background  $\delta^{13}\text{C}_{\text{carb}}$  signal with relatively minor  
55 variance in strata prior to the OAE 2 positive excursion (from the base to ~40 m), defined as  
56 segments C1 and C2. Although initiation of the OAE 2 CIE was placed at ~37 m by Li et al.  
57 (2017),  $\delta^{13}\text{C}$  values are similar to background values (< 2‰) and start to increase rapidly  
58 from ~40 m, which is recorded in the  $\delta^{13}\text{C}$  dataset of both previous publications (Li et al.,  
59 2017) and this study (Fig. 2). Therefore, we suggest that the OAE 2 CIE initiates at ~40 m in  
60 the section. Segment C3 (from ~40 m to ~48 m) is characterized by rapid increase in values of  
61  $\delta^{13}\text{C}_{\text{carb}}$ , marking the onset of OAE 2 and lasting for ~280 kyrs. In segment C4 (from ~48 m to  
62 64 m; ~350 kyr), the  $\delta^{13}\text{C}_{\text{carb}}$  values persist at ~3‰ followed by stepwise recovery of  $\delta^{13}\text{C}_{\text{carb}}$   
63 values to pre-excursion levels (segment C5). The ATS (Li et al., 2017) provides a foundation  
64 for future study on the evolution of paleoenvironment during OAE 2.

65

## 66 2. ANALYTICAL METHODS

## 67    **2.1 Procedure for Zn isotope measurement**

68        A leaching procedure used to prepare for Zn isotope measurements strictly followed the  
69    method of Liu et al. (2017). Samples were carefully checked to avoid visible veins and  
70    fractures, and were ground to ~ 200 mesh with an agate mortar that was carefully cleaned  
71    with Milli-Q water (18.2 M $\Omega$ ). The leaching steps were performed in a clean room under  
72    laminar flow hood (class 100) to minimize Zn contamination. Hydrosoluble salts and  
73    exchangeable fraction on clays were removed before leaching of carbonates using Milli-Q  
74    water and 1 N ammonium acetate (NH<sub>4</sub>AC), alternately. The carbonate fraction was  
75    selectively dissolved with two steps of 0.05 M super-pure acetic acid in a thermostat at 65 °C,  
76    until no bubbles were generated. The supernatants were collected after 20 min of  
77    centrifugation, followed by filtration. The leached supernatants were dried at 80 °C and  
78    added with 2 ml of 8 M HCl. This step was repeated twice to remove acetic acid. Finally, the  
79    solution was prepared in 1 ml of 8 M HCl for chemical anion-exchange separation.

80        The leaching solutions were dried at 80 °C. Zinc was purified by an ion-exchange  
81    chromatography using Bio-Rad strong anion resin AG-MP-1M. 2 ml pre-cleaned resin was  
82    loaded onto the column. Matrix elements were eluted in the first 10 ml of 8 N HCl. Copper  
83    and iron were then collected in the following 24 ml of 8 N HCl +0.001% H<sub>2</sub>O<sub>2</sub> and 18 ml of  
84    2N HCl. Zinc was collected in the subsequent 15 ml of 0.5N HNO<sub>3</sub>. This procedure allows Ca  
85    to be completely separated from Zn and a 100% recovery for Zn. The Zn fractions were  
86    repeatedly dried and dissolved with 3% HNO<sub>3</sub> to remove all chlorine prior to isotope analysis.

87        Zinc isotopic ratios were measured using a Neptune plus multi-collector inductively  
88    coupled plasma mass-spectrometry (MC-ICP-MS) at the Isotope Geochemistry Laboratory of

the China University of Geosciences (Beijing). Sample-standard bracketing method was used to correct for instrumental mass fractionation. The samples and standards are run in ~200 ppb diluted solution dissolved in 3% (v) HNO<sub>3</sub>. The take-up time is 80 s. The Zn isotope data for leaching solutions and residues are reported in Table DR. 2. Zn isotope data of the leachates are the mean of the two steps of leaching on the samples, which agree with each other within  $\pm 0.1\%$ . All samples analyzed in this study yield a slope of 2.08 in a  $\delta^{68}\text{Zn}$ – $\delta^{66}\text{Zn}$  cross-plot, which is consistent with the mass-dependent line with a slope of 2, indicating mass-dependent Zn isotope fractionation and no analytical artifacts from unresolved isobaric interferences on Zn isotopes.

## **2.2 Measurements of major and trace element concentrations of bulk sample**

Analyses of major element concentrations were conducted at the State Key Laboratory of Geological Processes and Mineral Resources, China University of Geosciences, Beijing and the Wuhan SampleSolution Analytical Technology Co., Ltd., Wuhan, China. For elemental oxide concentration analysis, a 0.7g sample (200 mesh) was mixed with 7.0g of lithium borate and fused to glass beads. The addition of a small amount (100 mg) of the halide LiBr acted as a release agent when using platinum molds. The mixture was heated in a high frequency fusion machine at ~1000 °C, until thoroughly melted. Then the fused beads were loaded into the XRF instrument for testing on a Shimadzu wavelength dispersive X-ray fluorescence spectrometer. Concentrations of the major elements are listed in Table DR. 1.

Trace element analysis of whole rock samples were conducted on an Agilent 7700e ICP-MS at the Wuhan SampleSolution Analytical Technology Co., Ltd., Wuhan, China. The

111 detailed sample-digesting procedure was as follows: (1) Sample powders (200 mesh) were  
112 placed in an oven at 105 °C for drying of 12 hours; (2) 50 mg sample powder was accurately  
113 weighed and placed in a Teflon bomb; (3) 1 ml HNO<sub>3</sub> and 1 ml HF were slowly added into  
114 the Teflon bomb; (4) The Teflon bomb was put in a stainless steel pressure jacket and heated  
115 to 190 °C in an oven for >24 hours; (5) After cooling, the Teflon bomb was opened and placed  
116 on a hotplate at 140 °C and evaporated to incipient dryness, and then 1 ml HNO<sub>3</sub> was added  
117 and evaporated to dryness again; (6) 1 ml of HNO<sub>3</sub>, 1 ml of Milli-Q water and 1 ml internal  
118 standard solution of 1 ppm In were added, and the Teflon bomb was resealed and placed in the  
119 oven at 190 °C for >12 hours; (7) The final solution was transferred to a polyethylene bottle  
120 and diluted to 100 g by the addition of 2% HNO<sub>3</sub>. V/Cr ratios of bulk sample (Table DR. 2)  
121 were employed to investigate the redox condition of the studied interval (Fig. 2).

122

### 123 **2.3 Measurement of trace element concentrations in leachates**

124 Sample preparation for measurement of trace element concentrations were largely similar  
125 to the method described above for the Zn-isotope analysis, with a few differences: 1)  
126 exclusion of treatment of the Milli-Q water and 1 N ammonium acetate to remove the  
127 exchangeable fraction; 2) The leached supernatants were dried at 80 °C and added with 0.5 ml  
128 of HNO<sub>3</sub>; 3) 5 ml Milli-Q water and 0.3 ml of 6% HNO<sub>3</sub> were added into the beaker at 80 °C  
129 for 2 hours to dissolve the sample. The final solution was transferred to a polyethylene bottle  
130 and diluted to 100 g by the addition of 2% HNO<sub>3</sub>. Element abundances were analyzed on an  
131 Agilent 7700e ICP-MS at the Wuhan SampleSolution Analytical Technology Co., Ltd.,  
132 Wuhan, China. The Zn concentration in carbonates is calculated from Zn contents in the

leaching solutions divided by the contents of carbonates (Zn/Ca,  $\mu\text{g/g}$ ), the latter of which are calculated based on major elements in the bulk rocks.

Because Sr/Ca and  $\delta^{18}\text{O}$  values may be altered significantly in cases of major change in carbonate precipitation rate (Lorens, 1981; Watkins et al., 2014), or during extensive carbonate diagenesis (Swart, 2015), the fact that there is insignificant co-variation between  $\delta^{66}\text{Zn}$  values and these two proxies (Figs. DR2 and DR3) indicates that neither process is responsible for the observed excursion in  $\delta^{66}\text{Zn}$ .

### 3. Figures

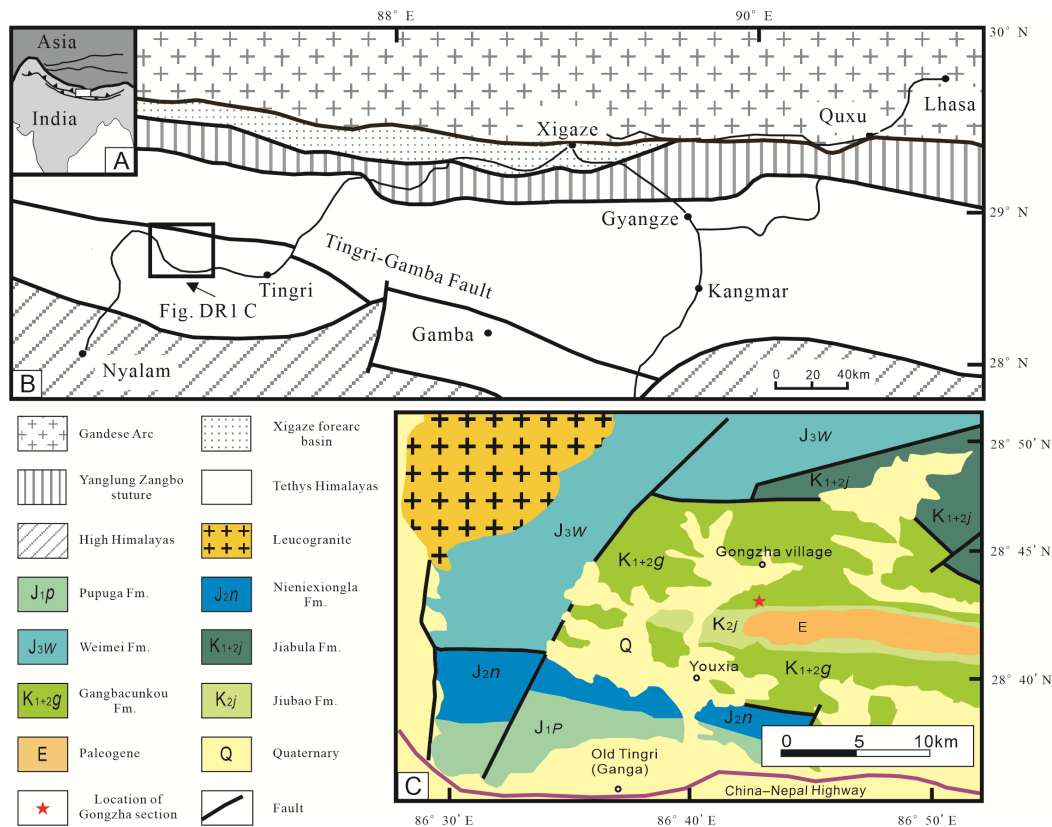

Fig. DR 1 Tectonic units of the southern Tibet (A and B) (Li et al., 2006) and geological map of the studied area showing the location of studied section (C) (modified from Hu et al., 2010).

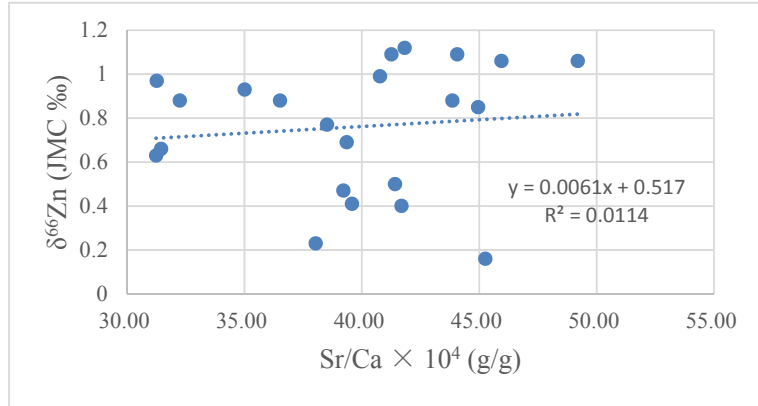

146

147 Fig. DR 2 Cross plot of  $\delta^{66}\text{Zn}$ –Sr/Ca of carbonates showing the absence of co-variation. The  
 148 lack of  $\delta^{66}\text{Zn}$ – $\delta^{18}\text{O}$  (Fig. DR 2) and  $\delta^{66}\text{Zn}$ –Sr/Ca covariance indicates that the Zn isotope shift  
 149 is not related to precipitation rate or diagenesis.

150

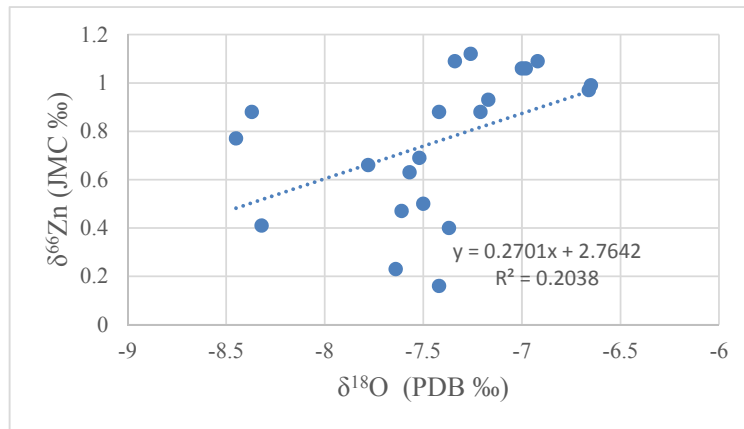

151

152

153 Fig. DR 3 Cross plot of  $\delta^{66}\text{Zn}$ – $\delta^{18}\text{O}$  of carbonates showing the absence of co-variation. The  
 154 lack of  $\delta^{66}\text{Zn}$ – $\delta^{18}\text{O}$  and  $\delta^{66}\text{Zn}$ –Sr/Ca (Fig. 3 in main text) covariance indicates that the Zn  
 155 isotope shift is not related to precipitation rate or diagenesis.

156

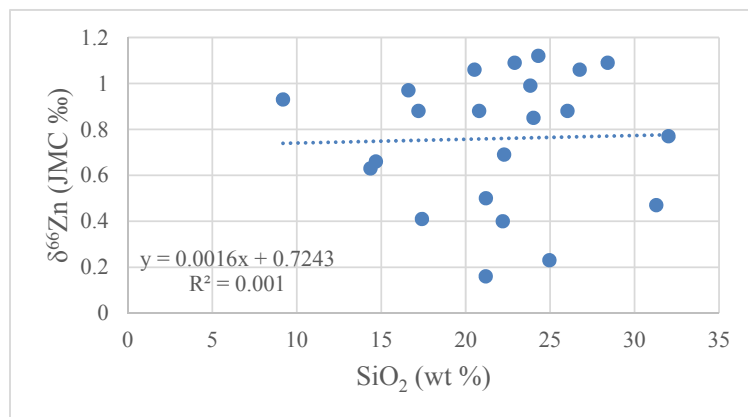

157

158

159 Fig. DR 4 Cross plot of  $\delta^{66}\text{Zn}$  vs.  $\text{SiO}_2$  of bulk sediments from the Gongzha section. The  
 160 absence of correlation suggests that the temporal  $\delta^{66}\text{Zn}$  variations are not caused by  
 161 adsorption of Zn onto silicate or clay phases.

162

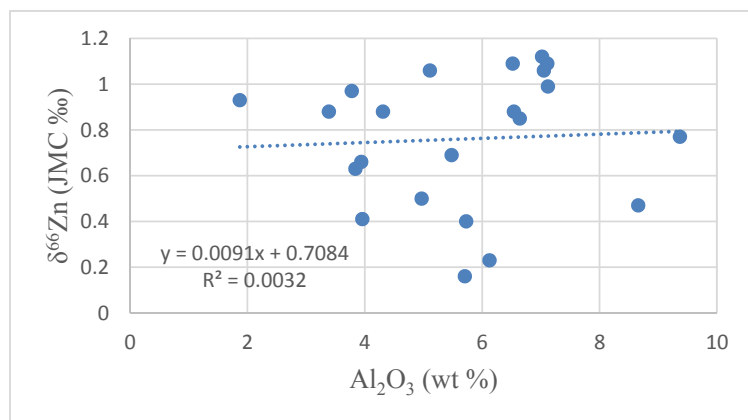

163

164 Fig. DR 5 Cross plot of  $\delta^{66}\text{Zn}$  vs.  $\text{Al}_2\text{O}_3$  of bulk sediments from the Gongzha section. The  
 165 absence of correlation suggests that the temporal  $\delta^{66}\text{Zn}$  variations are not caused by  
 166 adsorption of Zn onto silicate or clay phases.

167

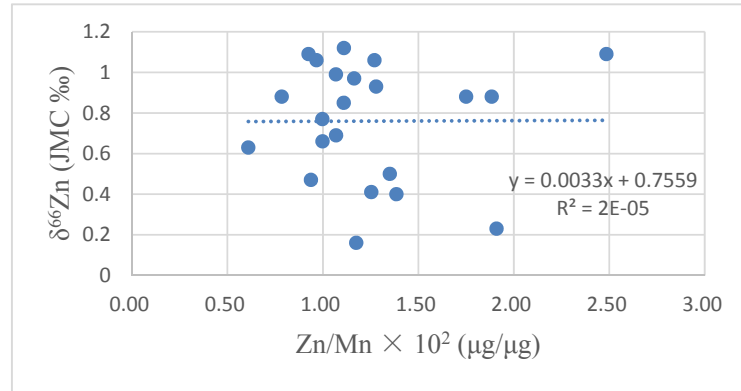

168

169 Fig. DR 6 Cross plot of  $\delta^{66}\text{Zn}$  vs. Zn/Mn in leachates from the Gongzha section. The  
 170 absence of correlation suggests that the temporal  $\delta^{66}\text{Zn}$  variations are not caused by leaching  
 171 of ferromanganese coatings.

172

173 **4. Tables**

174

175 Table DR 1 Weight concentration of elemental oxides (wt %)

| Sample Number | Height/m | SiO <sub>2</sub> | TiO <sub>2</sub> | Al <sub>2</sub> O <sub>3</sub> | TFe <sub>2</sub> O <sub>3</sub> | MnO  | MgO  | CaO   | K <sub>2</sub> O | Na <sub>2</sub> O | P <sub>2</sub> O <sub>5</sub> | LOI   | Total  |
|---------------|----------|------------------|------------------|--------------------------------|---------------------------------|------|------|-------|------------------|-------------------|-------------------------------|-------|--------|
| 09GZ240       | 27.19    | 20.52            | 0.6              | 5.11                           | 3.67                            | 0.09 | 1.04 | 37.26 | 0.7              | 0.27              | 0.09                          | 30.49 | 99.84  |
| 09GZ261       | 29.21    | 28.41            | 0.93             | 7.11                           | 5.36                            | 0.09 | 1.23 | 29.08 | 1.29             | 0.3               | 0.07                          | 25.39 | 99.26  |
| 09GZ274       | 30.56    | 26.03            | 0.83             | 6.54                           | 5.23                            | 0.1  | 1.24 | 30.98 | 1.21             | 0.21              | 0.08                          | 26.62 | 99.07  |
| 09GZ292       | 32.21    | 24.3             | 0.81             | 7.02                           | 4.26                            | 0.09 | 1.18 | 32.88 | 1.18             | 0.31              | 0.1                           | 27.82 | 99.95  |
| 09GZ302       | 33.25    | 26.75            | 0.88             | 7.05                           | 5.43                            | 0.09 | 1.32 | 30.4  | 1.32             | 0.22              | 0.1                           | 26.09 | 99.65  |
| 09GZ333       | 36.1     | 23.83            | 0.69             | 7.12                           | 5.22                            | 0.11 | 1.24 | 32.49 | 1.01             | 0.13              | 0.25                          | 27.56 | 99.65  |
| 09GZ349       | 37.49    | 24.02            | 0.76             | 6.64                           | 6                               | 0.09 | 1.38 | 31.61 | 1.06             | 0.19              | 0.12                          | 27.28 | 99.15  |
| 09GZ367       | 38.92    | 22.9             | 0.76             | 6.52                           | 4.22                            | 0.06 | 1.21 | 34.23 | 1.18             | 0.71              | 0.08                          | 28.41 | 100.28 |
| TOC1          | 40.05    | 32.01            | 1.08             | 9.37                           | 5.99                            | 0.04 | 1.22 | 24.66 | 1.92             | 0.37              | 0.11                          | 22.62 | 99.39  |
| TOC3          | 41       | 31.29            | 1.08             | 8.66                           | 5.79                            | 0.05 | 1.21 | 26.7  | 1.46             | 0.33              | 0.09                          | 23.31 | 99.97  |
| TOC6          | 42.05    | 22.28            | 0.67             | 5.48                           | 4.85                            | 0.06 | 1.11 | 34.94 | 0.74             | 0.22              | 0.6                           | 28.39 | 99.34  |
| TOC8          | 42.8     | 21.20            | 0.65             | 4.97                           | 3.19                            | 0.05 | 0.83 | 36.71 | 0.82             | 0.49              | 0.11                          | 30.66 | 99.69  |
| TOC-11        | 43.9     | 17.41            | 0.47             | 3.96                           | 2.43                            | 0.04 | 0.65 | 40.22 | 0.60             | 0.57              | 0.08                          | 33.28 | 99.71  |
| TOC-14        | 45.1     | 21.19            | 0.62             | 5.71                           | 5.27                            | 0.04 | 1.00 | 34.55 | 0.81             | 0.30              | 0.07                          | 29.97 | 99.53  |
| TOC-25        | 49.75    | 22.19            | 0.77             | 5.73                           | 3.13                            | 0.03 | 0.87 | 35.43 | 1.06             | 0.45              | 0.07                          | 30.06 | 99.77  |
| TOC-33        | 52.6     | 24.96            | 0.82             | 6.13                           | 3.98                            | 0.03 | 1.13 | 33.16 | 1.03             | 0.36              | 0.07                          | 28.50 | 100.15 |
| TOC36         | 53.75    | 17.21            | 0.54             | 3.39                           | 2.17                            | 0.03 | 0.86 | 41.66 | 0.55             | 0.13              | 0.06                          | 33.05 | 99.65  |
| TOC43         | 56.5     | 9.18             | 0.23             | 1.87                           | 1.77                            | 0.04 | 0.71 | 48.38 | 0.23             | 0.18              | 0.05                          | 37.39 | 100.03 |
| TOC54         | 61.8     | 14.36            | 0.36             | 3.84                           | 2.68                            | 0.04 | 0.95 | 43.27 | 0.34             | 0.14              | 0.09                          | 34.16 | 100.23 |
| TOC56         | 63.1     | 14.68            | 0.43             | 3.94                           | 2.41                            | 0.04 | 0.95 | 42.91 | 0.43             | 0.1               | 0.05                          | 34.21 | 100.15 |
| TOC59         | 64.6     | 20.8             | 0.63             | 4.31                           | 2.83                            | 0.03 | 0.87 | 39.07 | 0.71             | 0.2               | 0.06                          | 31.21 | 100.72 |
| 09GZ654       | 66.14    | 16.61            | 0.4              | 3.78                           | 2.74                            | 0.06 | 0.97 | 40.96 | 0.43             | 0.1               | 0.06                          | 33.21 | 99.32  |

176

177 Table DR 2 Zinc isotope ratios of leached carbonate fraction,  $\delta^{18}\text{O}$  values (‰), V/Cr and Sr/Ca ratios of bulk sample, Zn concentration and Zn/Mn and

178 Zn/Ca ratios in leachates. Sr/Ca ratio values are multiplied by  $10^4$ . The concentration of Ca is calculated from the concentration of CaO:  $\text{Ca (\%)} = \text{CaO (\%)} \times$

179  $\times 40/56$ . Zn/Mn and Zn/Ca ratio values are multiplied by  $10^2$ .

| Height/m | $\delta^{66}\text{Zn}$ (‰) | 2SD  | $\delta^{68}\text{Zn}$ (‰) | 2SD  | $\delta^{68}\text{Zn} / \delta^{66}\text{Zn}$ | $\delta^{18}\text{O}$ (‰) | V/Cr ( $\mu\text{g}/\mu\text{g}$ ) | Sr ( $\mu\text{g}/\text{g}$ ) | Sr/Ca | Zn ( $\mu\text{g}/\text{g}$ ) | Zn/Mn | Zn/Ca |
|----------|----------------------------|------|----------------------------|------|-----------------------------------------------|---------------------------|------------------------------------|-------------------------------|-------|-------------------------------|-------|-------|
| 27.19    | 1.06                       | 0.04 | 2.13                       | 0.01 | 2.00                                          | -6.98                     | 1.24                               | 1309                          | 51.63 | 6.50                          | 0.97  | 24.42 |
| 29.21    | 1.09                       | 0.01 | 2.16                       | 0.01 | 1.99                                          | -7.34                     | 1.15                               | 915                           | 44.20 | 6.12                          | 0.93  | 29.47 |
| 30.56    | 0.88                       | 0.05 | 1.81                       | 0.03 | 2.06                                          | -7.21                     | 1.23                               | 970                           | 44.28 | 5.94                          | 0.78  | 26.84 |
| 32.21    | 1.12                       | 0.02 | 2.25                       | 0.05 | 2.01                                          | -7.26                     | 1.26                               | 982                           | 42.28 | 7.24                          | 1.11  | 30.85 |
| 33.25    | 1.06                       | 0.01 | 2.13                       | 0.04 | 2.02                                          | -7.00                     | 1.22                               | 998                           | 48.59 | 8.69                          | 1.27  | 40.03 |
| 36.10    | 0.99                       | 0.00 | 1.99                       | 0.02 | 2.01                                          | -6.65                     | 1.31                               | 946                           | 40.93 | 8.25                          | 1.07  | 35.54 |
| 37.49    | 0.85                       | 0.02 | 1.80                       | 0.02 | 2.12                                          | N/A                       | 1.25                               | 1015                          | 48.05 | 6.53                          | 1.11  | 28.94 |
| 38.92    | 1.09                       | 0.03 | 2.19                       | 0.01 | 2.02                                          | -6.92                     | 1.25                               | 1009                          | 43.42 | 10.6                          | 2.49  | 43.26 |
| 40.05    | 0.77                       | 0.02 | 1.70                       | 0.06 | 2.21                                          | -8.45                     | 1.16                               | 678                           | 38.43 | 2.97                          | 1.00  | 16.84 |
| 41.00    | 0.47                       | 0.06 | 4.85                       | 0.06 | 2.00                                          | -7.61                     | 1.07                               | 748                           | 39.21 | 3.21                          | 0.94  | 16.82 |
| 42.05    | 0.69                       | 0.06 | 0.92                       | 0.06 | 1.97                                          | -7.52                     | 1.46                               | 982                           | 39.32 | 4.58                          | 1.07  | 18.37 |
| 42.80    | 0.50                       | 0.06 | 1.35                       | 0.01 | 1.97                                          | -7.50                     | 1.31                               | 1086                          | 41.41 | 5.38                          | 1.35  | 20.52 |
| 43.90    | 0.41                       | 0.06 | 1.01                       | 0.06 | 2.01                                          | -8.32                     | 1.54                               | 1137                          | 45.83 | 3.65                          | 1.25  | 12.71 |
| 45.10    | 0.16                       | 0.06 | 0.83                       | 0.06 | 2.03                                          | -7.42                     | 1.35                               | 1117                          | 45.26 | 3.20                          | 1.18  | 12.98 |
| 49.75    | 0.40                       | 0.06 | 2.12                       | 0.06 | 2.07                                          | -7.37                     | 1.10                               | 1055                          | 41.71 | 3.03                          | 1.39  | 11.96 |
| 52.60    | 0.23                       | 0.09 | 0.81                       | 0.06 | 1.99                                          | -7.64                     | 1.11                               | 901                           | 38.03 | 4.56                          | 1.91  | 19.27 |
| 53.75    | 0.88                       | 0.04 | 0.45                       | 0.08 | 1.98                                          | -7.42                     | 1.00                               | 1087                          | 39.09 | 4.04                          | 1.75  | 13.58 |

|       |      |      |      |      |      |       |      |      |       |      |      |       |
|-------|------|------|------|------|------|-------|------|------|-------|------|------|-------|
| 56.50 | 0.93 | 0.03 | 1.88 | 0.07 | 2.03 | -7.17 | 0.95 | 1210 | 36.76 | 3.74 | 1.28 | 10.82 |
| 61.80 | 0.63 | 0.02 | 1.89 | 0.06 | 3.01 | -7.57 | 1.04 | 966  | 31.23 | 1.87 | 0.61 | 6.05  |
| 63.10 | 0.66 | 0.00 | 1.37 | 0.03 | 2.08 | -7.78 | 1.09 | 964  | 31.51 | 2.72 | 1.00 | 8.87  |
| 64.60 | 0.88 | 0.05 | 1.78 | 0.01 | 2.03 | -8.37 | 1.04 | 900  | 33.05 | 4.31 | 1.88 | 15.44 |
| 66.14 | 0.97 | 0.05 | 2.04 | 0.03 | 2.11 | -6.66 | 1.10 | 915  | 31.56 | 4.93 | 1.16 | 16.84 |

180     References:

- 181     Bomou, B., Adatte, T., Tantawy, A.A., Mort, H., Fleitmann, D., Huang, Y., and Föllmi, K.B.,  
182             2013, The expression of the Cenomanian–Turonian oceanic anoxic event in Tibet:  
183             *Palaeogeography, Palaeoclimatology, Palaeoecology*, v. 369, p. 466–481.
- 184     Hu, X., Wang, C., Li, X., Fan, S., Peng, P., 2001, The Cenomanian-Turonian anoxic event in  
185             southern Tibet: A study of organic geochemistry: *Chin. J. Geochem.*, v. 20, p. 289–295.
- 186     Hu, X., Jansa, L., Chen, L., Griffin, W. L., O'Reilly, S. Y., and Wang J., 2010,  
187             Provenance of Lower Cretaceous Wölong volcanoclastics in the Tibetan Tethyan  
188             Himalaya: Implications for the final breakup of eastern Gondwana: *Sedimentary*  
189             *Geology*, v. 223, p. 193–205.
- 190     Johnston, D.T., Macdonald, F.A., Gill, B.C., Hoffman, P.F. and Schrag, D.P., 2012,  
191             Uncovering the Neoproterozoic carbon cycle: *Nature*, v. 483, p. 320–324.
- 192     Junium, C.K., and Arthur, M.A., 2007, Nitrogen cycling during the Cretaceous,  
193             Cenomanian-Turonian Oceanic Anoxic Event II: *Geochem. Geophys. Geosyst.*, 8,  
194             Q03002, doi:10.1029/2006GC001328.
- 195     Kuypers, M.M.M., van Breugel, Y., Schouten, S., Erba, E., and Sinninghe Damsté, J.S., 2004,  
196             N<sub>2</sub>-fixing cyanobacteria supplied nutrient N for Cretaceous oceanic anoxic events:  
197             *Geology*, v. 32, p. 853 – 856.
- 198     Li, X., Jenkyns, H.C., Wang, C., Hu, X., Chen, X., Wei, Y., Huang, Y., and Cui, J., 2006,  
199             Upper Cretaceous carbon- and oxygen-isotope stratigraphy of hemipelagic carbonate  
200             facies from southern Tibet. China: *Journal of the Geological Society, London*, v. 163, p.  
201             375–382.

202 Li, Y., Isabel, P.M., Liu, Z., and Ma, L., 2017, Astronomical constraints on global  
 203 carbon-cycle perturbation during Oceanic Anoxic Event 2 (OAE2): Earth and Planetary  
 204 Science Letters, v. 462, p. 35-46.

205 Lorens, R.B., 1981, Sr, Cd, Mn and Co distribution coefficients in calcite as a function of  
 206 calcite precipitation rate: *Geochimica et Cosmochimica Acta*, v. 45, p. 553–561.

207 Meyer, K.M., Yu, M., Lehrmann, D., van de Schootbrugge, B. and Payne, J.L., 2013,  
 208 Constraints on early Triassic carbon cycle dynamics from paired organic and inorganic  
 209 carbon isotope records: *Earth and Planetary Sciences Letters*, v. 361, p. 429–435.

210 Swart, P.K., 2015, The geochemistry of carbonate diagenesis: The past, present and future:  
 211 *Sedimentology*, v. 62, p. 1233–1304.

212 Wan, X., Wignall, P.B., Zhao, W., 2003, The Cenomanian-Turonian extinction and oceanic  
 213 anoxic event: evidence from southern Tibet: *Palaeogeography Palaeoclimatology*  
 214 *Palaeoecology*, v. 199, p. 283–298.

215 Watkins, J.M., Hunt, J.D., Ryerson, F.J., DePaolo, D.J., 2014, The influence of temperature,  
 216 pH, and growth rate on the  $\delta^{18}\text{O}$  composition of inorganically precipitated calcite: *Earth*  
 217 *and Planetary Science Letters*, v. 404, p. 332–343.

218 Zhang, X., Gao, Y., Chen, X., Hu, D., Li, M., Wang, C., Shen, Y., 2019, Nitrogen isotopic  
 219 composition of sediments from the eastern Tethys during Oceanic Anoxic Event 2:  
 220 *Palaeogeography Palaeoclimatology Palaeoecology*, v. 515, p. 123-133.
